# Supplementary material for: Highly selective colorimetric and reversible fluorometric turn-off sensors based on the pyrimidine derivative: mimicking logic gate operation and potential applications
Source: Royal Society of Chemistry journal article supplement (doi:10.1039/c5nj02118a), 2015-11-16
Supplement: c5nj02118a1.pdf [file c5nj02118a1.pdf]

## Electronic Supplementary Information for

### Highly selective colorimetric and reversible fluorometric turn-off sensors based on pyrimidine derivative: mimicking logic gate operation and potential application

Neha Gupta, Divya Singhal, Ashok Kumar Singh\*

Department of Chemistry, Indian Institute of Technology-Roorkee,  
Roorkee-247667, India

\*E-mail: [akscyfcy@iitr.ernet.in](mailto:akscyfcy@iitr.ernet.in)

#### Table of Contents:

- ESI Fig. 1** Visual ion sensing of S<sub>1</sub> and S<sub>2</sub> with various metal ions in DMF.
- ESI Fig. 2** Stability in color of complex S-Ni(II) with definite interval of time (A,D) 0 hour, (B,E) after 24 hours, (C,F) after 36 hours.
- ESI Fig. 3** LC-HRMS (ESI+) mass spectra of (2:1) complex of S<sub>1</sub>, S<sub>2</sub> with Ni(II) ion.
- ESI Fig. 4** <sup>1</sup>H NMR titration spectra of S<sub>1</sub> in DMSO-d<sub>6</sub> upon addition of different equivalents of Ni(II) ion.
- ESI Fig. 5** The limit of detection (LOD) calculated by fluorescence emission linear fitting.
- ESI Fig. 6** Effect of pH on absorption study of S<sub>1</sub> (a) and S<sub>2</sub> (b) in DMF.
- ESI Fig. 7** Effect of water content on absorption study and emission intensity of S<sub>1</sub> and S<sub>2</sub> in DMF.
- ESI Fig. 8** The limit of detection (LOD) calculated by fluorescence emission linear fitting.
- ESI Fig. 9** Optimised IR frequencies of receptors S<sub>1</sub> and S<sub>2</sub>.
- ESI Fig. 10** <sup>1</sup>H NMR spectra of receptors S<sub>1</sub> and S<sub>2</sub> in DMSO-d<sub>6</sub> at room temperature.
- ESI Fig. 11** <sup>13</sup>C NMR spectra of receptors S<sub>1</sub> and S<sub>2</sub> in DMSO-d<sub>6</sub> at room temperature.
- ESI Fig. 12** FT-IR spectra of receptor S<sub>1</sub> and S<sub>2</sub>.
- ESI Fig. 13** UV-Vis spectra of receptor S<sub>1</sub> and S<sub>2</sub>.
- ESI Table 1** Determination of nickel ion concentration in waste water samples with the receptor S<sub>1</sub>.

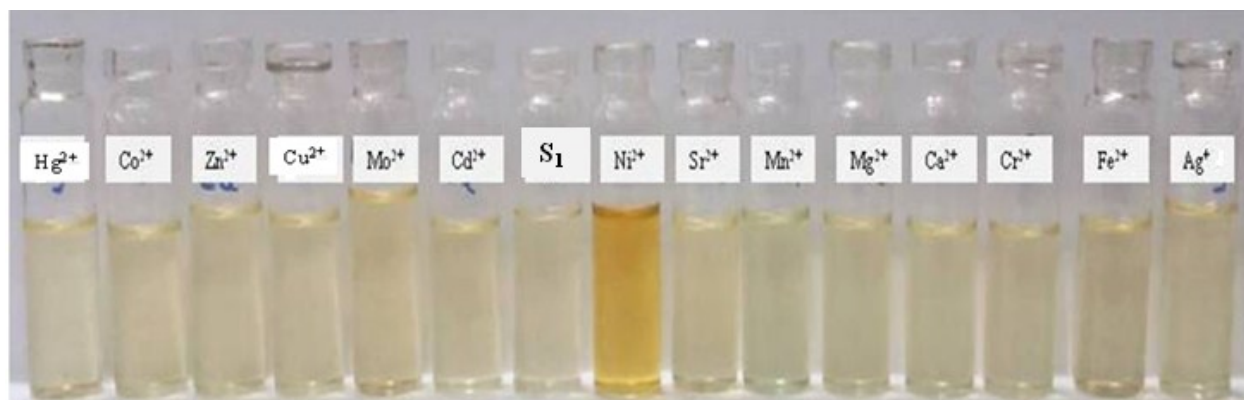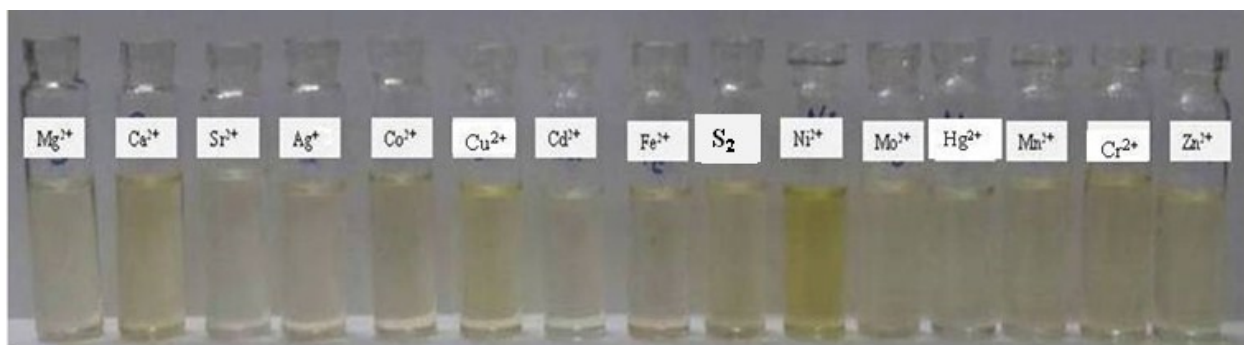

**ESI Fig. 1** Visual ion sensing of  $S_1$  and  $S_2$  with various metal ions in DMF.

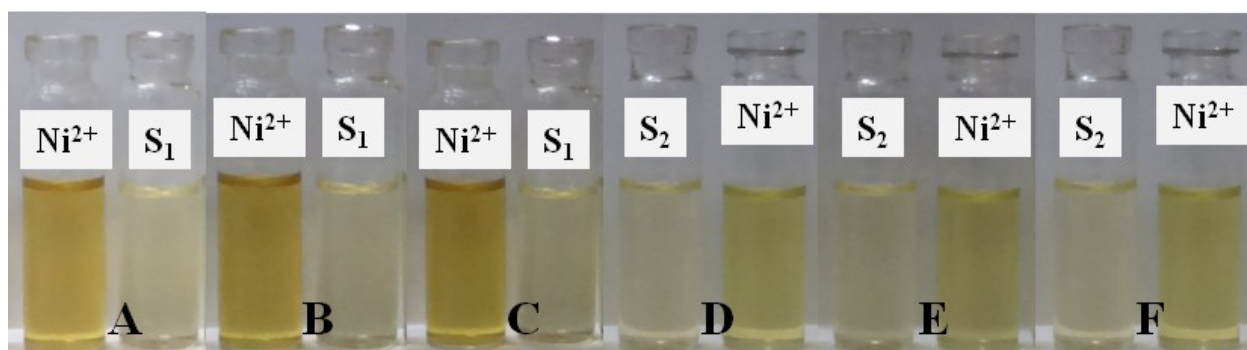

**ESI Fig. 2** Stability in color of complex  $S$ -Ni(II) with definite interval of time (A,D) 0 hour, (B,E) after 24 hours, (C,F) after 36 hours.

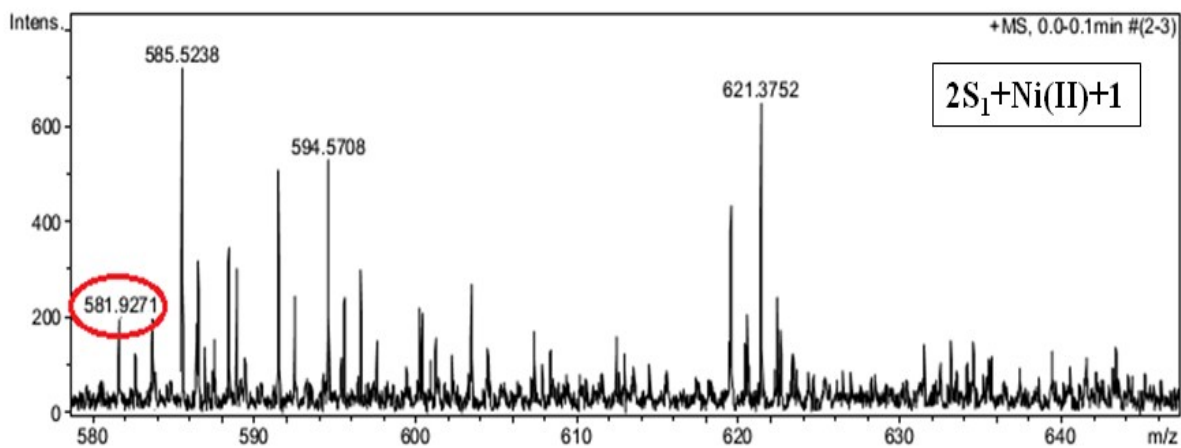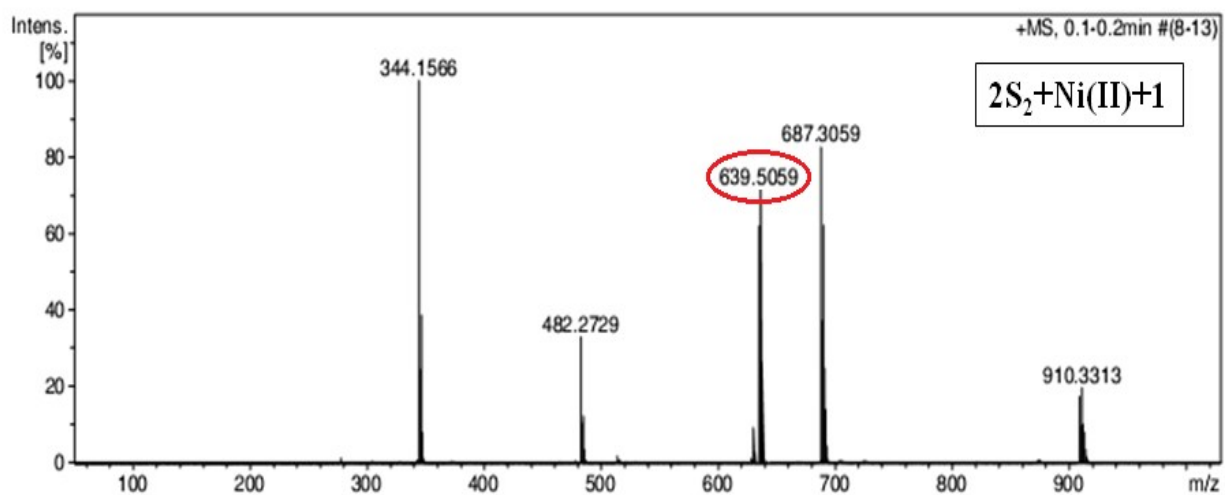

**ESI Fig. 3** LC-HRMS (ESI+) mass spectra of (2:1) complex of  $S_1$ ,  $S_2$  with Ni(II) ion.

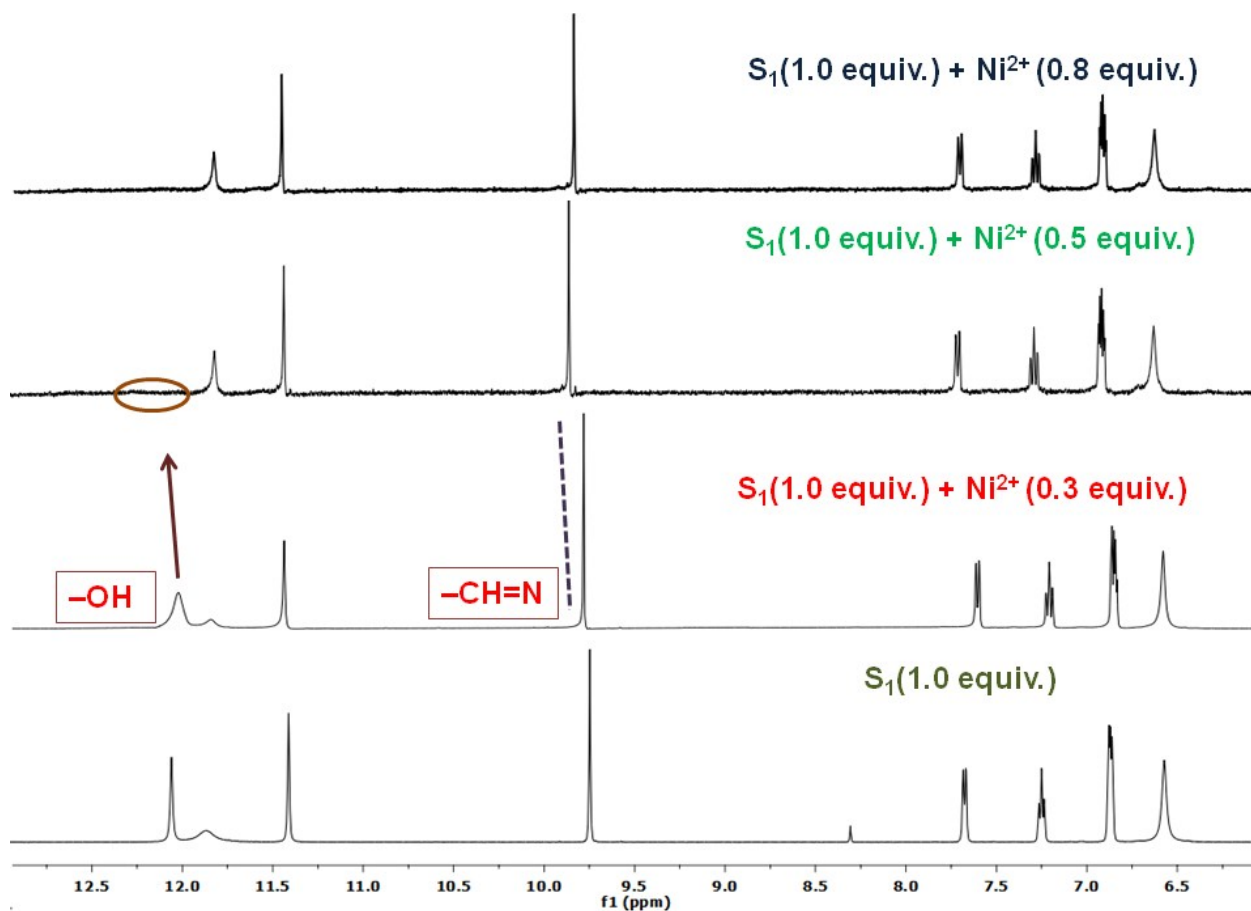

**ESI Fig. 4**  $^1\text{H}$  NMR titration spectra of  $\text{S}_1$  in  $\text{DMSO-d}_6$  upon addition of different equivalents of  $\text{Ni(II)}$  ion.

#### Determination of detection limit

Fluorescence intensity of  $\text{S}_1$  and  $\text{S}_2$  at each concentration of  $\text{Ni(II)}$  added, normalized between the maximum fluorescence intensity, found at zero equiv of  $\text{Ni(II)}$ , and the minimum fluorescence intensity, found at  $[\text{Ni(II)}] = 5 \times 10^{-6}$  M.

The limit of detection (LOD) values have been calculated by using the intercept of a plotted graph between  $(I - I_{\min}) / (I_{\max} - I_{\min})$  and  $\log[\text{Ni(II)}]$ .

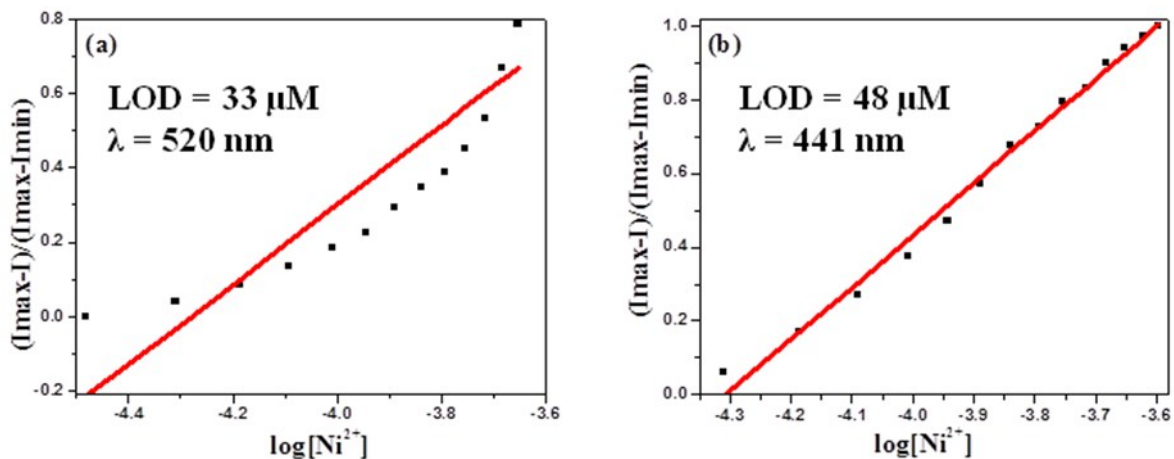

ESI Fig. 5 The limit of detection (LOD) calculated by fluorescence emission linear fitting.

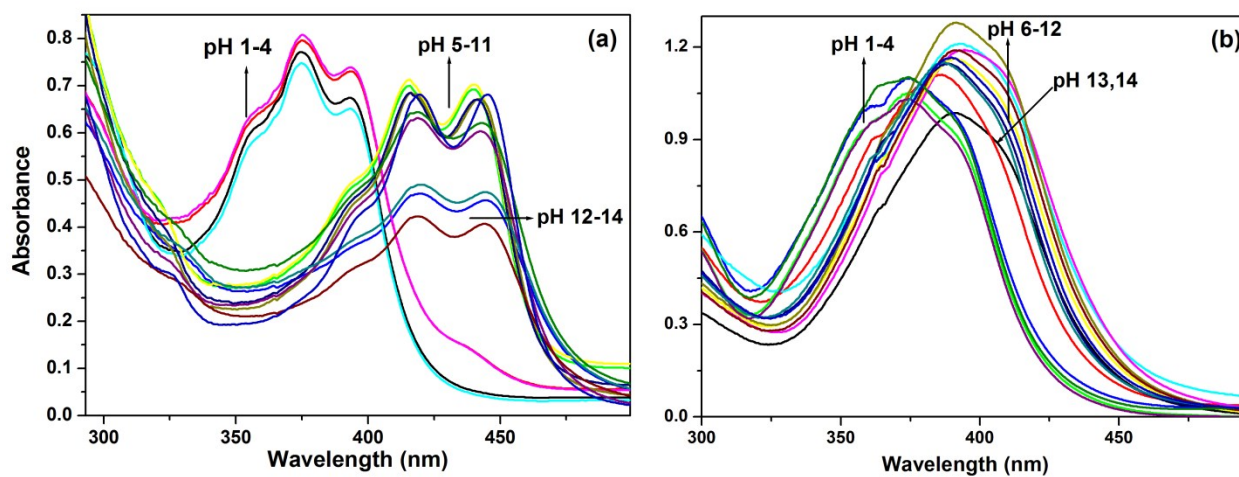

ESI Fig. 6 Effect of pH on absorption study of  $S_1$  (a) and  $S_2$  (b) in DMF.

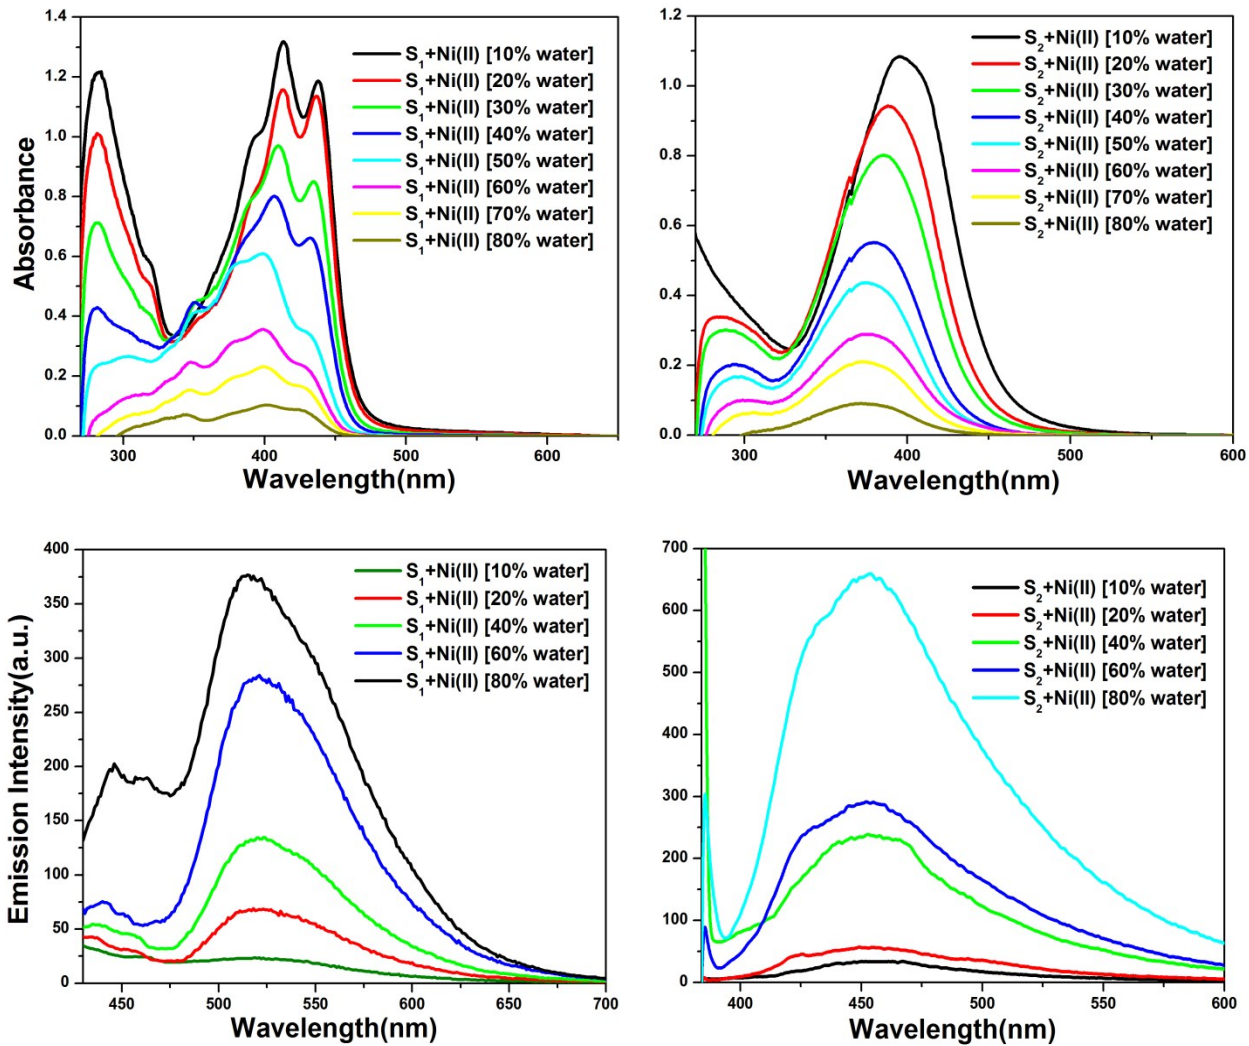

ESI Fig. 7 Effect of water content on absorption study and emission intensity of  $S_1$  and  $S_2$  in DMF.

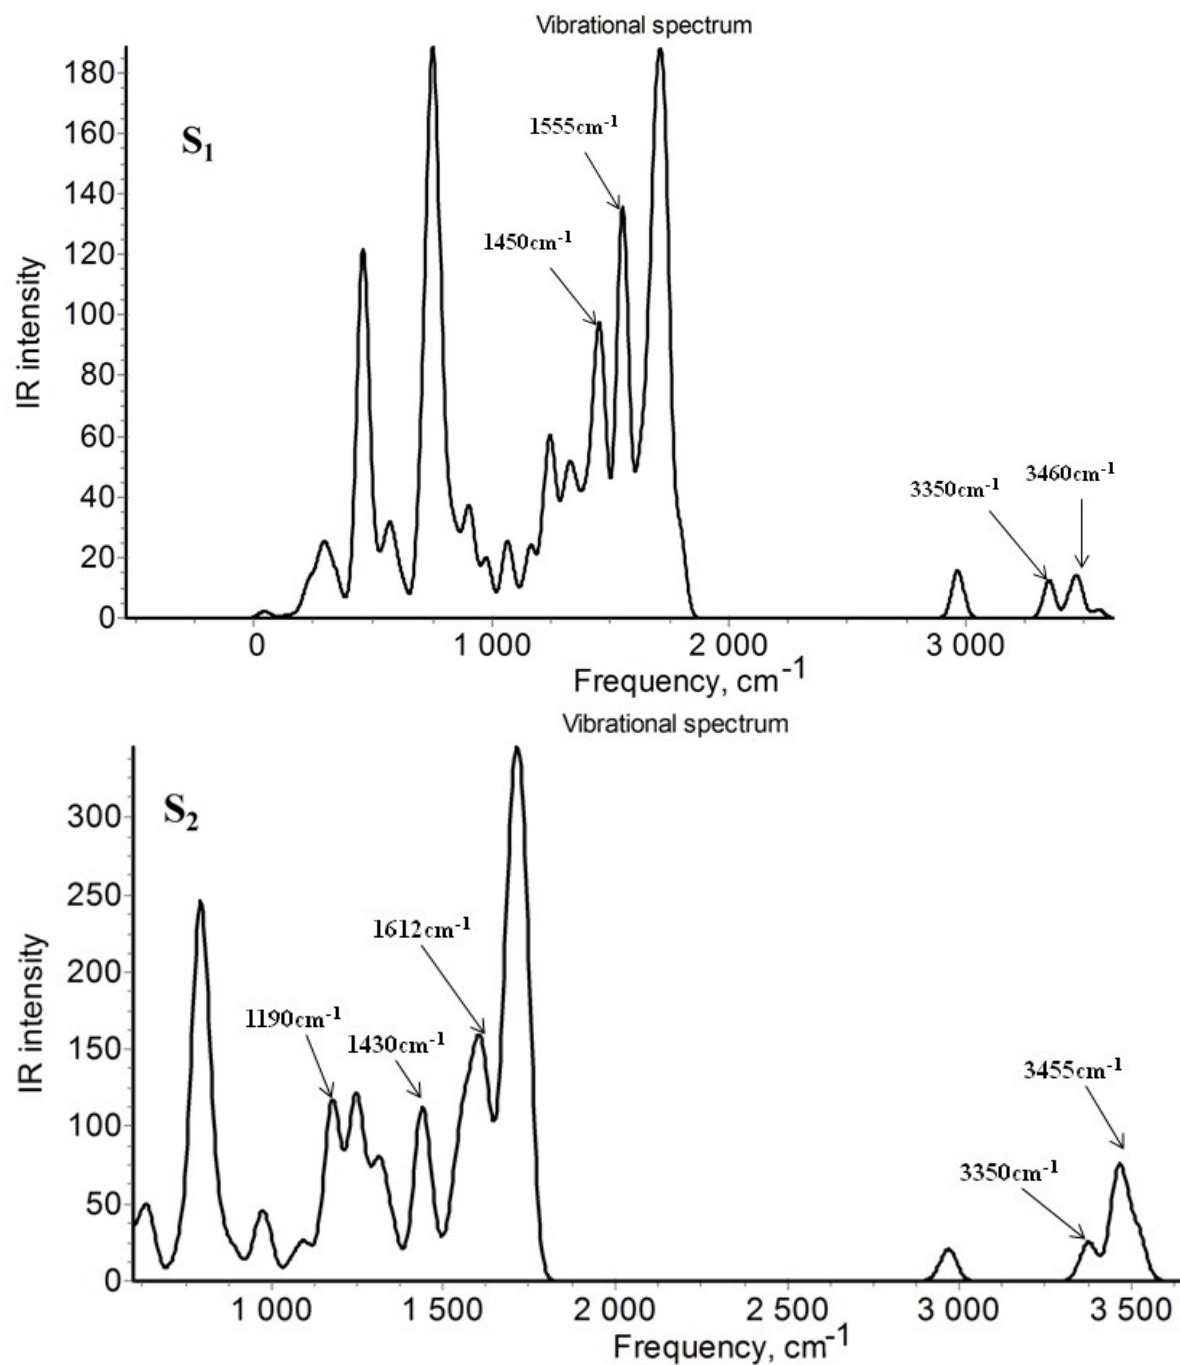

ESI Fig. 8 Optimised IR frequencies of receptors  $S_1$  and  $S_2$ .

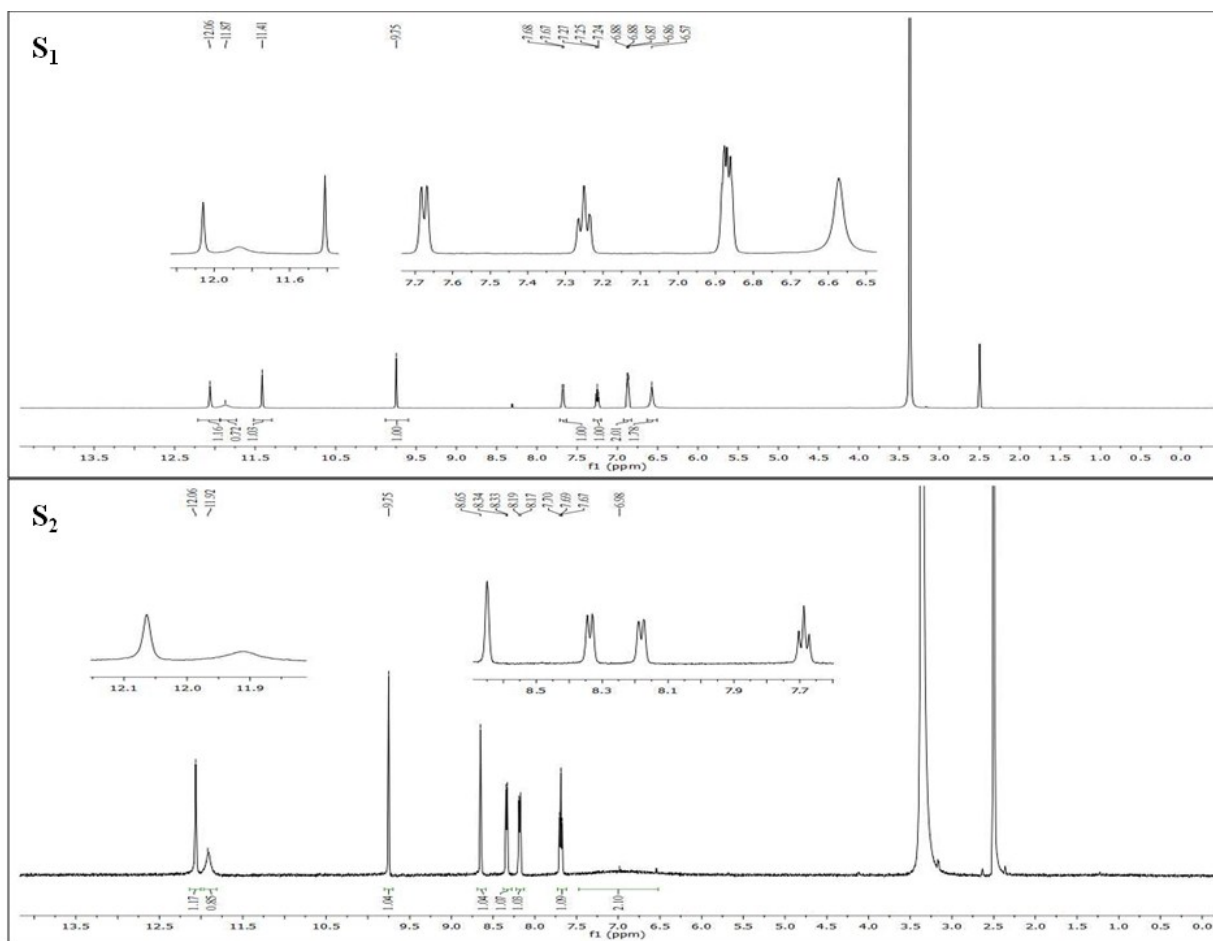

**ESI Fig. 9**  $^1\text{H}$  NMR spectra of receptors  $S_1$  and  $S_2$  in  $\text{DMSO-d}_6$  at room temperature.



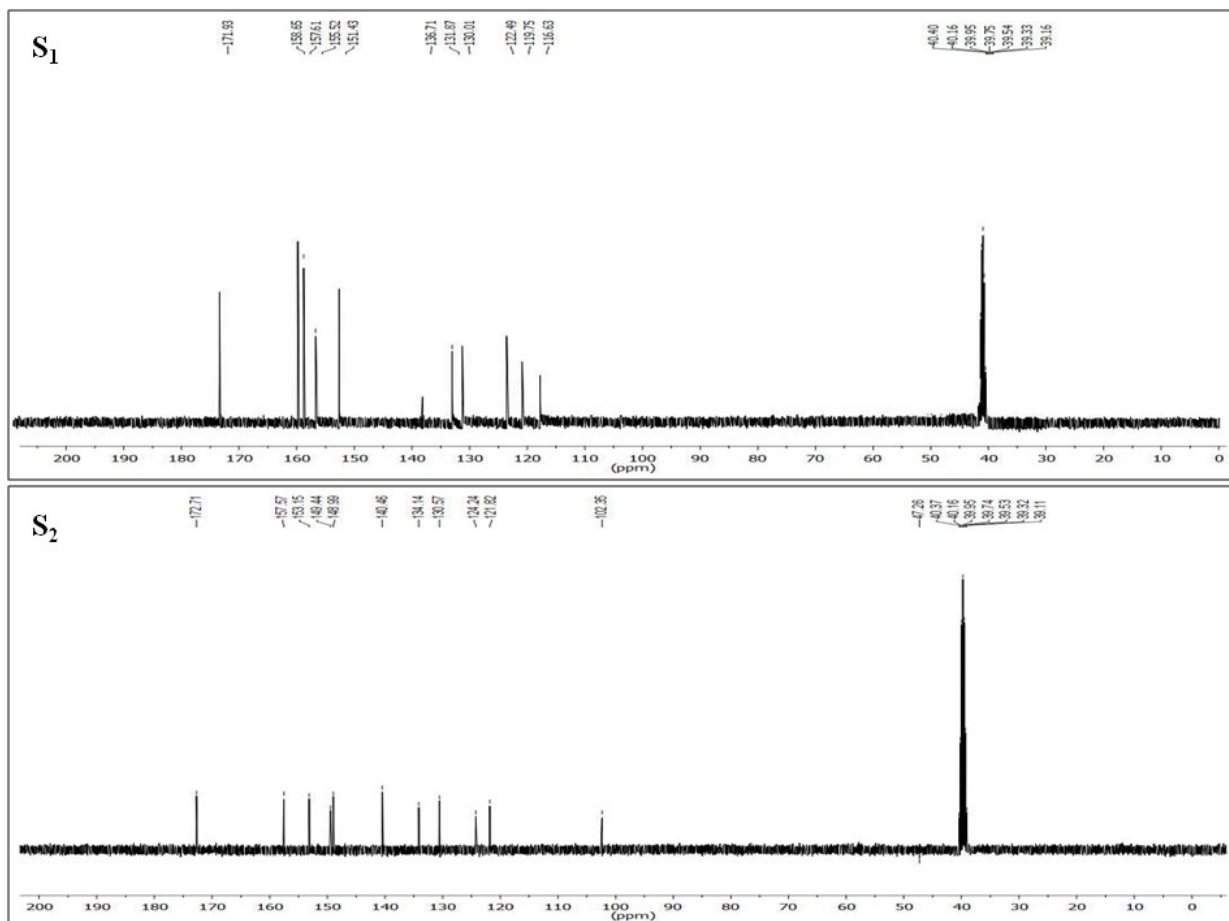

ESI Fig. 10 <sup>13</sup>C NMR spectra of receptors S<sub>1</sub> and S<sub>2</sub> in DMSO-d<sub>6</sub> at room temperature.

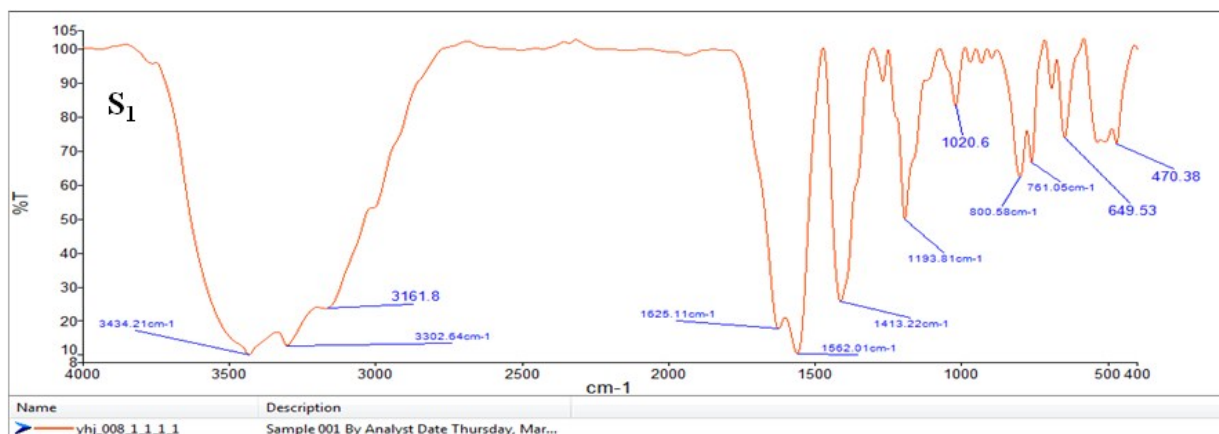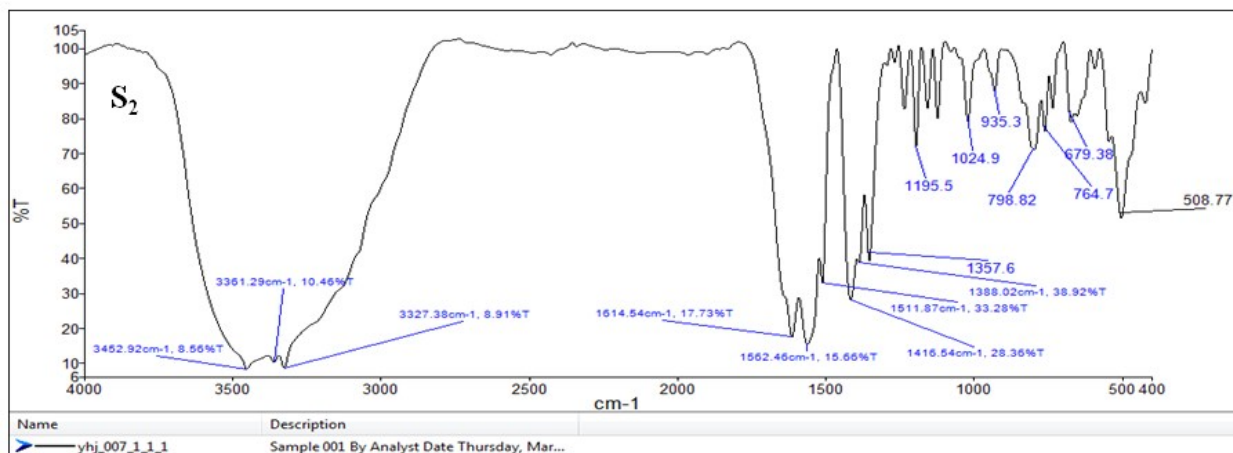

ESI Fig. 11 FT-IR spectra of receptor S<sub>1</sub> and S<sub>2</sub>.

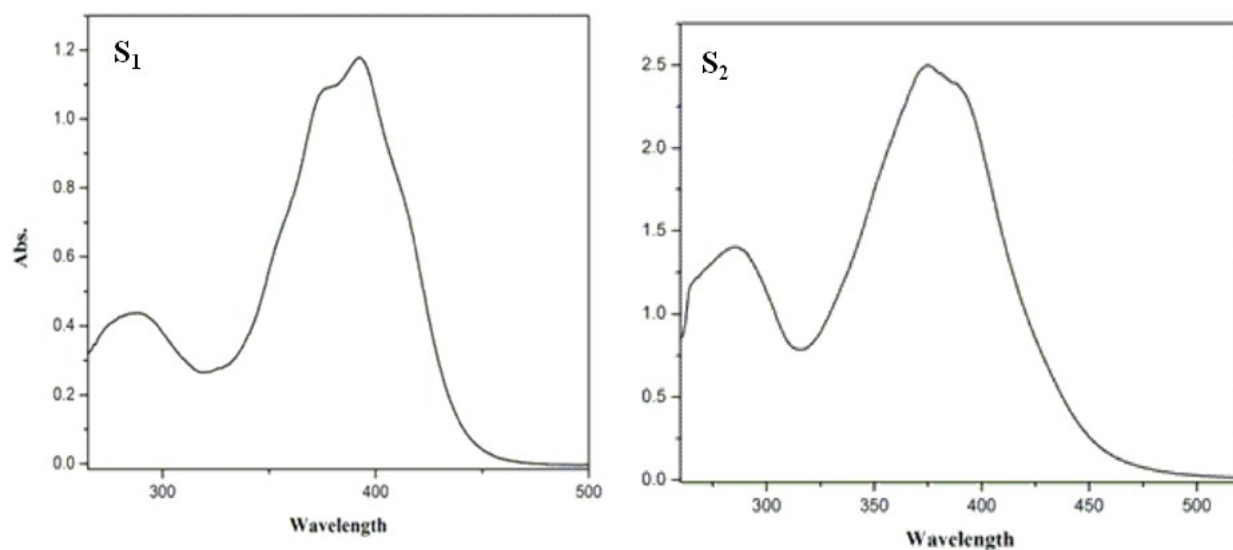

ESI Fig. 12 UV-Vis spectra of receptor S<sub>1</sub> and S<sub>2</sub>.

**ESI Table 1** Determination of nickel ion concentration in waste water samples with the receptor  $S_1$ .

| <b>Sample</b>                 | <b>Addition of nickel ion</b> | <b>Uv-Vis study<sup>a</sup></b> | <b>AAS study<sup>a</sup></b> | <b>Recovery of Receptor <math>S_1</math>(%)</b> |
|-------------------------------|-------------------------------|---------------------------------|------------------------------|-------------------------------------------------|
| <b>River Ganga (Roorkee)</b>  | $4.00 \times 10^{-5}$         | $3.75 \times 10^{-5}$           | $3.60 \times 10^{-5}$        | 93.75%                                          |
| <b>River Ganga (Haridwar)</b> | $4.00 \times 10^{-5}$         | $3.88 \times 10^{-5}$           | $3.72 \times 10^{-5}$        | 97.0%                                           |
| <b>Tap Water (Roorkee)</b>    | $4.00 \times 10^{-5}$         | $3.91 \times 10^{-5}$           | $3.65 \times 10^{-5}$        | 97.75%                                          |

<sup>a</sup>Standard deviation calculation for five measurements
